# Supplementary material for: Adolescent Body Dissatisfaction in Contrasting Socioeconomic Milieus, Coming from a French and Luxembourgish Context
Source: PubMed Central journal article supplement (PMC6982110; doi:10.3390/ijerph17010061), 2019-12-20
Supplement: ijerph-17-00061-s001.pdf [file ijerph-17-00061-s001.pdf]

APPENDIX 1

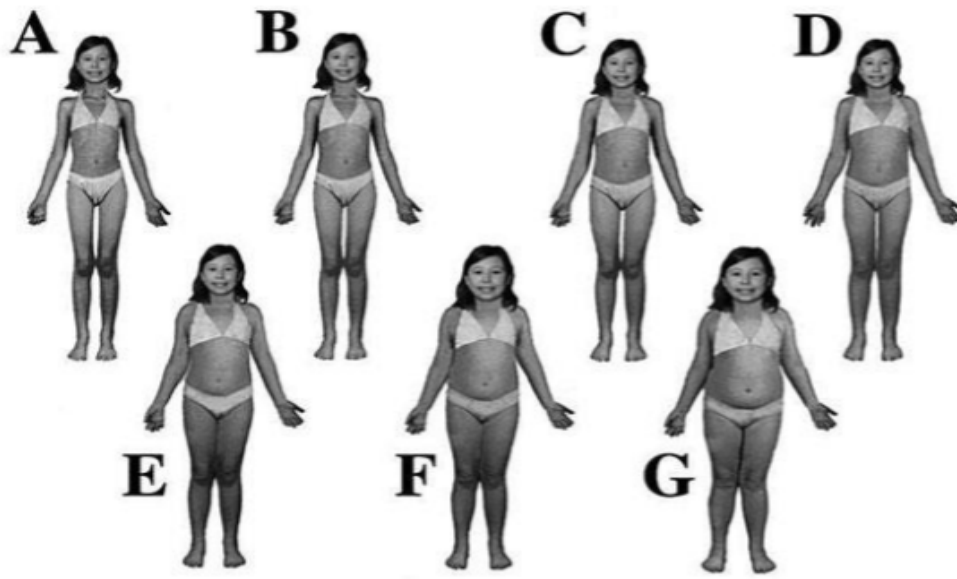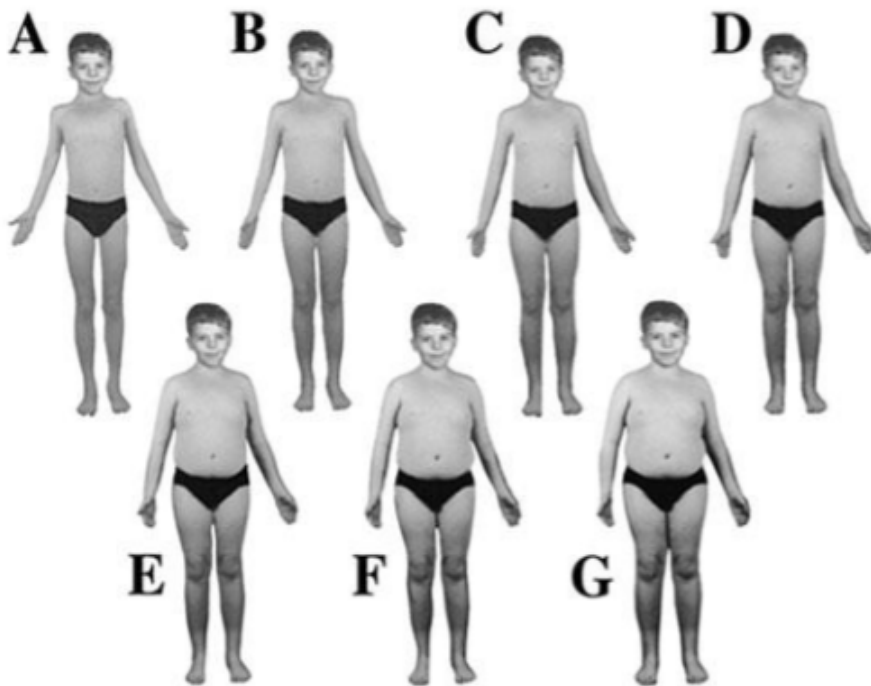

~~Figure 1: Pictures presented to the girls and the boys of the Children's Body Image Scale-Children [10]~~
